# Supplementary material for: BIOME-Preserve: A novel storage and transport medium for preserving anaerobic microbiota samples for culture recovery
Source: PLoS One. 2022 Jan 21;17(1):e0261820. doi: 10.1371/journal.pone.0261820 (PMC8782539; doi:10.1371/journal.pone.0261820)
Supplement: S1 Table — Metrics include the number of reads per sample, the number of reads that mapped to a bacterial genome, and number of reads mapping to genus, species, and strain level. (XLSX) [file pone.0261820.s004.xlsx]

## Sheet: sample_overview_Booster_Shot_Me
Sample_ID	Read_Depth	Reads_Mapping	Reads_Genus_Level	Reads_Species_Level	Reads_Strain_Level	Reads_KOs
D3.STOOL.YCFA.CFU.1	8014666	4891122	4428175	3424659	1906926	2082350
D3.120.BRU.CFU.1	7956326	4887279	4516726	3740236	1947319	1382931
D2.120.YCFA.CFU.1	7607294	5060746	4915645	4575429	899015	2304819
D1.120.BP.R1	6940311	2285543	1742424	1487122	752745	731392
D3.72.BRU.CFU.1	6901910	4119765	3697289	2798222	1312513	1340560
D3.STOOL.BRU.CFU.2	6764346	4221989	3715228	1908072	883860	1494901
D3.72.YCFA.R1	6519775	4215974	3909995	2761191	1142462	1682454
D2.72.BP.R1	6300828	2463432	2114893	1764416	841956	873387
D1.72.YCFA.CFU.SL	6271113	3955988	3618321	3024275	946858	1538112
D1.120.YCFA.R2	6210948	4156250	3774298	1889156	573597	1787048
DON3.STOOL.BRU.R2	5840319	2871935	2509216	1461866	732358	999121
D1.120.SL.BP	5827152	1972263	1496418	1274344	645782	631660
D1.STOOL.YCFA.R2	5751475	2871908	2502302	2282041	1469027	1179885
D1.T0.YCFA.CFU.1	5729769	3057192	2357134	2040540	966714	1212882
D1.STOOL.BRU.CFU.1	5416151	3392673	2772904	1223296	494431	1195195
D1.72.BP.R1	5307944	1860642	1429417	1211217	600359	591378
D1.72.SL.BP	5217443	1754173	1341519	1142556	564359	554939
D1.72.CHOC.SL	5148821	3292291	2386097	1610680	1052219	1424592
D3.72.YCFA.CFU.1	5091549	3042258	2873158	2431235	984169	1058196
D1.STOOL.YCFA.R1	5052643	2542324	2205800	1989883	1142252	1031716
D1.STOOL.CHOC.R2	5040176	2930015	2343975	1273863	576434	1098680
D1.120.YCFA.CFU.R1	5033144	2822187	2254718	1969280	872222	932522
D2.STOOL.CTRL.1	4654191	1607620	1363165	1032279	553033	524067
D3.120.BRU.R1	4619608	2679466	2310154	1427668	709020	972848
D2.STOOL.YCFA.CFU.2	4351829	2385729	2103616	1913803	664243	977870
DON3.STOOL.YCFA.R1	4336863	2343623	2056862	1575388	886716	940592
D2.STOOL.YCFA.R2	4280112	2276263	1799003	1644494	593314	901374
D2.72.BRU.STOOL.R2	4258682	2541883	1536690	636667	359183	1203064
D1.STOOL.CHOC.R1	4226817	2510987	1985956	1032406	487222	954407
D2.120.YCFA.CFU.2	4168023	2478271	2453876	2217511	514624	1106028
D2.120.BP.R1	4053944	1382145	1194125	990865	446936	485410
D3.STOOL.BRU.CFU.1	4003843	2335154	2064495	1047463	483770	842120
D3.120.YCFA.R1	3997805	2352879	2226791	1679235	633384	879240
D3.72.BRU.R1	3996131	2058993	1774822	1104629	522633	697142
D2.STOOL.YCFA.CFU.1	3858704	2148192	1894494	1707079	606830	885463
D3.72.BP.R1	3845471	1727779	1504593	1123808	570588	525018
D1.72.YCFA.CFU.R2	3791580	2062112	1852649	1536469	464757	840441
D2.72.BRU.STOOL.R1	3742422	2165663	1374272	569820	305921	992337
D1.72.YCFA.CFU.R1	3699314	2101528	1979944	1614189	530351	820031
D3.72.CHOC.R1	3696548	1969066	1663659	777231	361396	779506
D3.72.CHOC.R2	3603565	2031602	1672485	799871	399579	670636
D1.120.SL.CHOC.R1	3528797	2392489	1655222	1036354	698717	1282455
D3.120.YCFA.CFU.2	3519526	2024620	1965353	1667028	721423	653534
D2.STOOL.BRU.CFU.2	3430583	1959690	1585435	794013	356378	761767
DON3.BP.120.R1	3398013	1414512	1229447	915485	455932	418361
D1.120.BRU.CFU.R2	3394712	1865891	1484767	1071821	569364	703210
D3.120.YCFA.CFU.1	3379534	1897960	1863222	1582649	595832	677272
D1.72.CHOC.R1	3167788	1920280	1374366	930754	550578	952489
D2.STOOL.CHOC.R1	2988144	1764502	1348653	439956	224774	738201
D2.72.CHOC.R1	2774560	1724571	1009533	294560	166895	871905
D1.120.BRU.CFU.R1	2711968	1419507	1097693	888660	551243	529323
D1.STOOL.BRU.R1	2585596	1213069	908877	570408	291360	501246
D2.72.YCFA.R2	2576515	1515377	1379623	1276008	279629	685662
D1.72.BRU.R1	2546187	1403518	956829	667379	410588	706933
DON3.STOOL.BRU.R1	2519985	1137207	993807	590897	301677	388648
D1.STOOL.YCFA.CFU.2	2511805	1080640	993248	945371	582932	474699
D3.120.BRU.CFU.2	2476608	1211881	1138460	993055	488677	357734
D3.72.YCFA.R2	2468739	1554265	1464270	1012753	421571	595267
D1.STOOL.BRU.R2	2405061	1130759	844621	507940	266747	455235
D1.STOOL.BRU.CFU.2	2348632	1276725	1047040	561564	270159	445466
D2.STOOL.BRU.R1	2319883	1216788	906260	433902	230238	510491
D2.72.CHOC.R2	2313034	1408237	843453	250284	140491	701299
D3.120.CHOC.R2	2260388	1258384	1069530	485570	239043	530555
D1.120.BRU.R2	2107023	1067594	737729	548718	356165	473995
D2.STOOL.CHOC.R2	2051990	1218665	892946	289964	149375	520646
D2.120.BRU.CFU.2	2035657	1197106	965373	795784	270813	537181
D1.72.YCFA.R1	2006904	1283136	1272987	880149	146021	562741
D1.72.YCFA.SL	1980114	1231487	1206784	770213	117154	576190
D2.120.YCFA.R1	1955315	1151874	1110374	1008409	215905	523031
D1.120.YCFA.CFU.R2	1938830	1083836	992437	703756	272999	386216
D1.72.BRU.CFU.R1	1926125	1077618	859248	666750	310252	456339
D1.BP.T0.YCFA.R1	1925985	865728	703970	639354	332737	365972
D2.72.BRU.CFU.1	1764008	1019779	786622	480584	233790	447855
D2.72.YCFA.R1	1751852	983761	886232	816611	188221	433756
D1.72.BRU.SL	1745447	891715	632886	459907	287282	399717
D1.120.SL.YCFA.R1	1723775	1033557	997648	589086	125497	444490
DON3.STOOL.YCFA.R2	1675378	825984	766860	587624	330216	324342
D2.120.CHOC.R1	1672710	1043101	645451	197253	112637	494719
D1.72.YCFA.R2	1659534	1000067	977440	543796	90310	464041
D2.STOOL.YCFA.R1	1625890	829729	751536	682858	210481	330591
D1.120.YCFA.CFU.SL	1608329	881604	781559	629950	243981	305763
D2.120.BRU.CFU.1	1578062	930766	639402	435457	208976	452630
D1.72.BRU.CFU.R2	1561076	880846	694780	551063	254304	378498
D2.120.BRU.R2	1554384	917903	541889	216131	129902	451129
DON3.STOOL.CHOC.R2	1519985	728495	647790	332895	161175	246914
D1.120.CHOC.R2	1500893	848562	603690	399412	258579	398400
D2.120.BRU.R1	1442817	872330	526350	208085	124248	426126
D3.120.BRU.R2	1438145	707061	599621	390985	203622	241064
D3.120.CHOC.R1	1409363	800159	688065	319301	157114	356152
D1.T0.BRU.CFU.1	1360615	778490	622034	270090	96251	282054
D1.120.SL.BRU.R1	1349234	713655	506654	365039	239961	321134
D3.72.BRU.R2	1344364	658972	562744	335074	162801	226750
D1.72.BRU.R2	1334597	699512	476359	322327	207471	344023
D1.120.BRU.CFU.SL	1298260	708000	564007	449987	235297	290083
D2.STOOL.BRU.CFU.1	1281202	665532	536695	270189	120337	256436
DON3.STOOL.CHOC.R1	1242572	632729	564669	252200	114183	201641
D1.120.CHOC.R1	1241757	710472	483034	302172	202317	358423
D2.72.BRU.CFU.2	1206874	658552	498196	254036	118933	283225
D3.72.BRU.CFU.2	1205734	606030	546539	403149	192092	204411
D1.120.BRU.R1	1175969	633441	425546	307005	209362	285805
D3.STOOL.CTRL.1	1170407	424058	376437	308386	173354	128175
D1.72.CHOC.R2	1145613	662868	454939	298701	178777	339615
D3.STOOL.YCFA.CFU.2	1054222	489929	460506	375316	225499	191418
D1.STOOL.YCFA.CFU.1	1005455	432338	406848	372468	226527	198466
D1.BP.T0.BRU.R1	987560	543981	425281	196807	86602	198395
D3.72.YCFA.CFU.2	904115	468856	447100	379695	147152	166515
D1.BP.T0.CHOC.R1	897088	532458	410286	154126	63554	194691
D2.120.CHOC.R2	881250	546150	334385	97076	55146	262868
D2.STOOL.BRU.R2	835225	413841	328646	150879	74075	162592
D2.72.YCFA.CFU.2	787493	430471	417866	386751	71370	196454
D1.STOOL.CTRL.1	700570	213409	176909	147247	78413	69602
D2.72.YCFA.CFU.1	626413	327147	316795	288004	62691	145266
D1.72.BRU.CFU.SL	559650	282655	211832	147937	70204	110342
D2.120.YCFA.R2	556799	318467	287359	257278	58623	146409
D1.120.YCFA.R1	496397	290516	279061	152210	31918	128434
D3.120.YCFA.R2	388341	205143	181707	130819	49781	79983
STERILE.DILBLANK	8851	53	45	29	19	9
STERILE.BP.SL	8223	37	32	18	12	2
STERILE.BP.0501930	5577	172	144	75	29	59
	2.89895e+06
